# Supplementary material
Source: Springer Nature journal article supplement (https://www.springermedizin.de/resource/supplementary/12967_2010_735_MOESM8_ESM.pdf/9577410)

**A****VX680(nM)**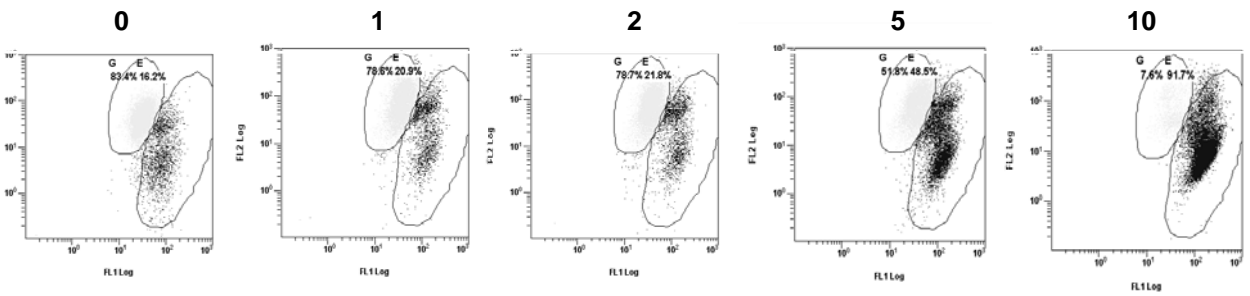

↑ aggregates  
→ monomer

**B****VX680(nM)****24h****48h**

0    1    2    5    10    0    1    2    5    10

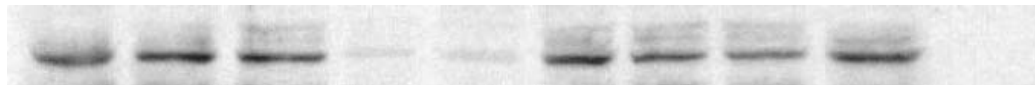**pAkt**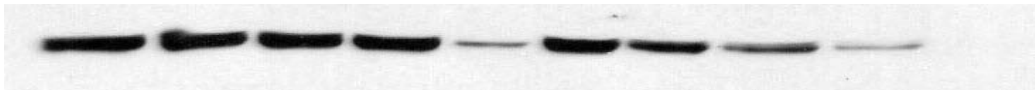**pGSK-3β**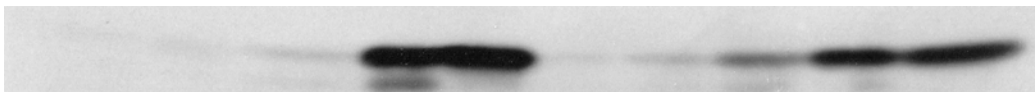**Cleaved caspase3**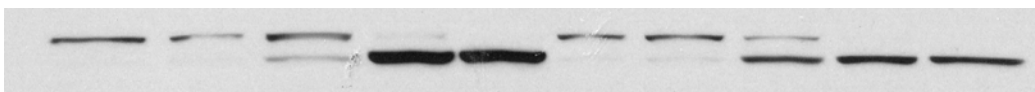**Cleaved PARP**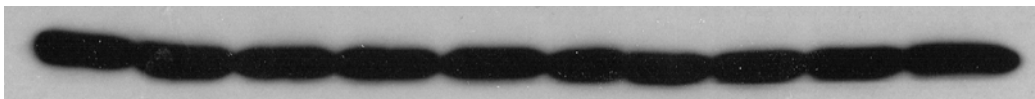**GAPDH**

Supplement: MOESM8 [file 9577410]
